# Supplementary material for: High barrier bio-nanocomposite films of ethyl cellulose integrated with modified nanocellulose: effect of nanocellulose's substituted side chains on film performance
Source: Royal Society of Chemistry journal article supplement (doi:10.1039/d4lp00356j), 2025-01-01
Supplement: d4lp00356j1.pdf [file d4lp00356j1.pdf]

## Supplementary Information

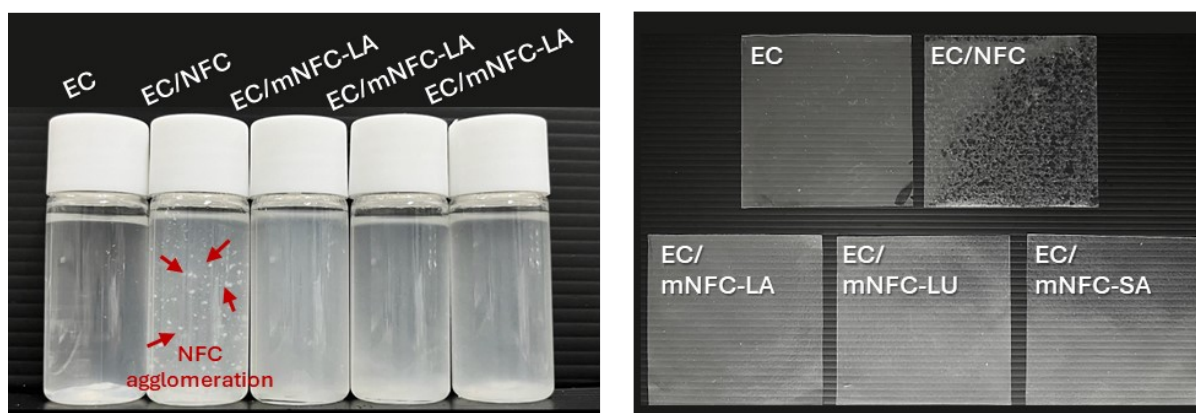

**Figure S1.** a) Photographs of the EC solution and EC solutions mixed with NFC and mNFCs; b) pure EC and EC-based nanocomposite films.
